# Supplementary material for: The Hippo pathway terminal effector TAZ/WWTR1 mediates oxaliplatin sensitivity in p53 proficient colon cancer cells
Source: PubMed Central journal article supplement (PMC11092100; doi:10.1186/s12885-024-12316-4), 2024-05-14
Supplement: 12885_2024_12316_MOESM1_ESM.pdf [file 12885_2024_12316_MOESM1_ESM.pdf]

## **SUPPLEMENTARY MATERIAL**

**The Hippo pathway terminal effector TAZ/WWTR1 mediates oxaliplatin sensitivity in p53 proficient colon cancer cells**

Věra Slaninová, Lisa Heron-Milhavet, Mathilde Robin, Laura Jeanson, Adam Aissanou, Diala Kantar, Diego Tosi, Laurent Bréhélin, Céline Gongora, and Alexandre Djiane

Slaninova et al. Figure S1

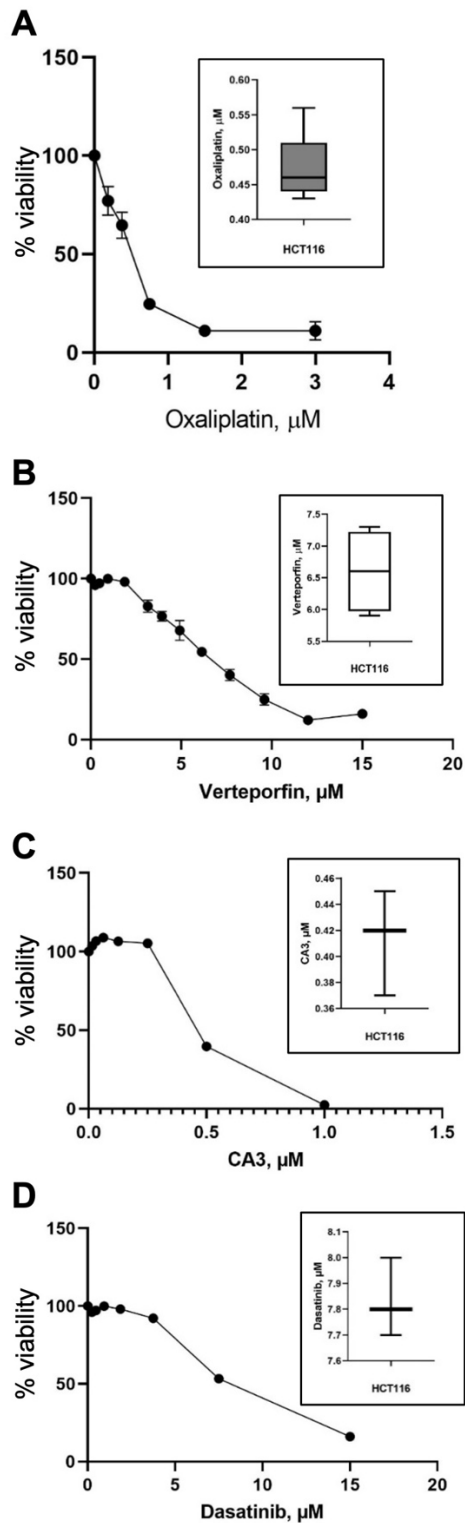

**Supplemental Figure S1. Cell viability in response to drugs**

Cells were treated with increasing doses of oxaliplatin (A), Verteporfin (B), CA3 (C) and Dasatinib (D) for 96h. Cell viability analysis was then assessed using SRB assay and the IC50 of each drug could be calculated as the concentration that reduced cell numbers by 50% (shown in the insets).

## Slaninova et al. Figure S2

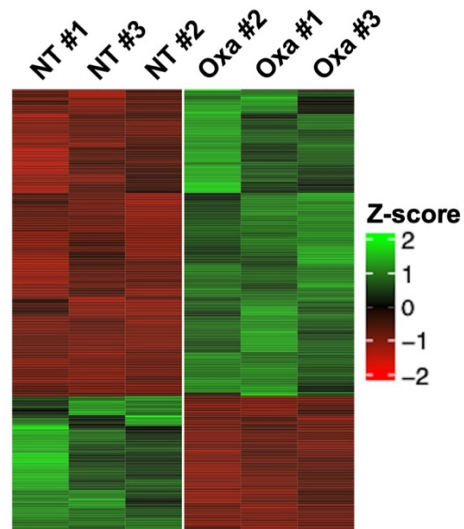

### **Supplemental Figure S2. Genes regulated by oxaliplatin treatment**

Heat map corresponding to the genes differentially expressed in HCT116 cells after 24h of oxaliplatin treatment at IC50 (see Supplemental Table 1). The three replicates for the non-treated (NT) and treated (Oxa) are shown.

Slaninova et al. Figure S3

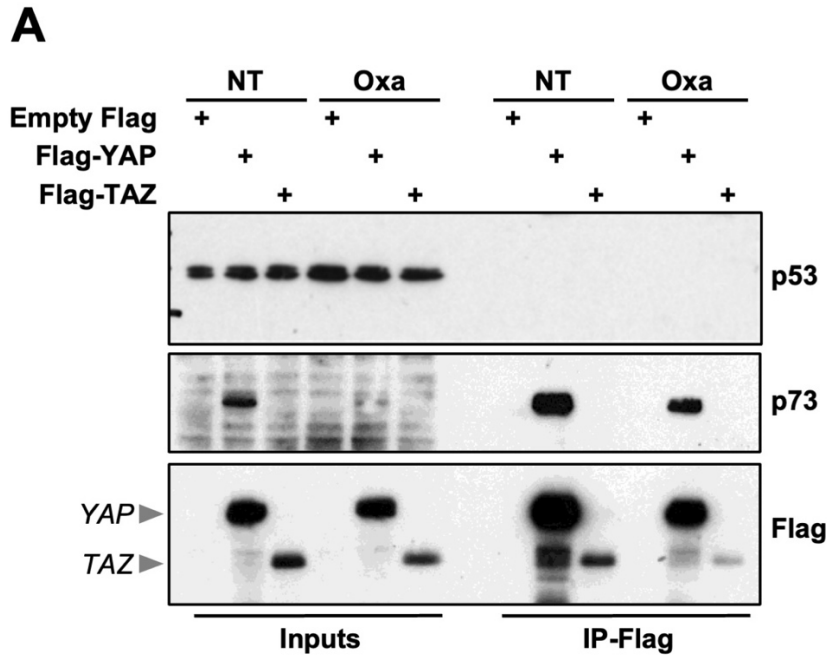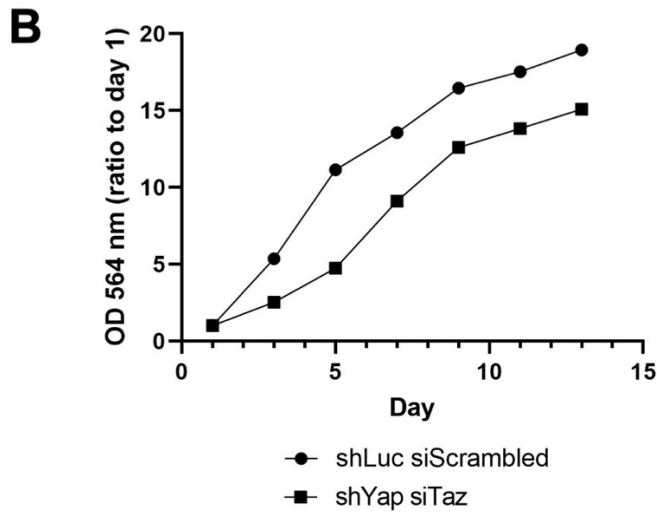

**Supplemental Figure S3.**

**A. Interaction between YAP/TAZ and p53 protein family members in HCT116 cells**

Western blot analysis of Flag (YAP or TAZ) immunoprecipitates on protein extracts from HCT116 treated (Oxa), or not (NT) showing an interaction between YAP and p73 (n=3).

**B. Effect of shYAP/siTaz on the growth of HCT116 cells**

Proliferation curve measured by colorimetric SRB assay

Figure 1C

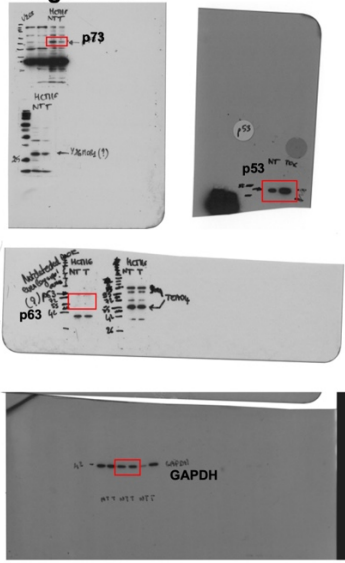

Figure 2B

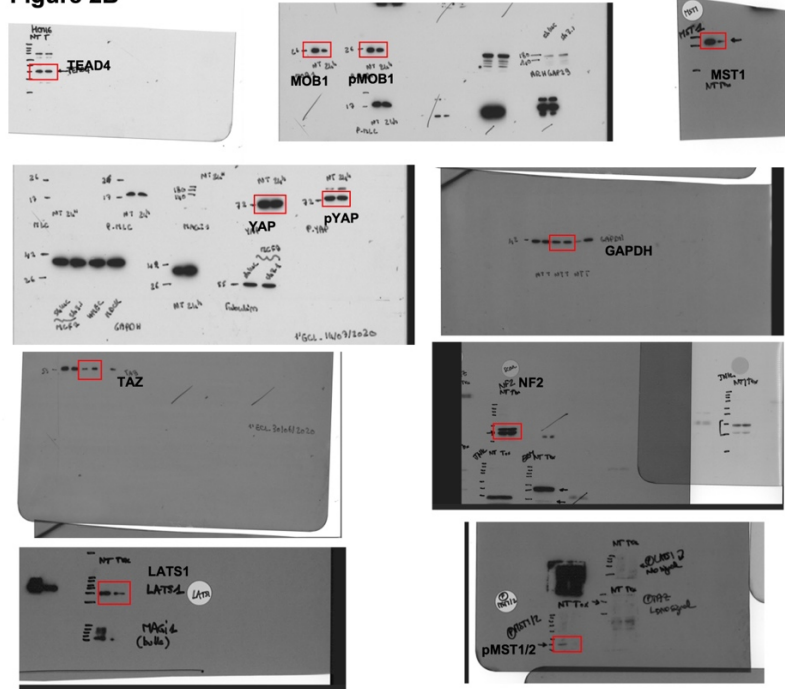

Figure 2C

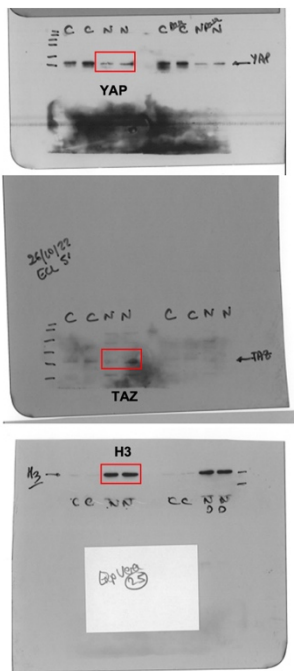

Figure 3C

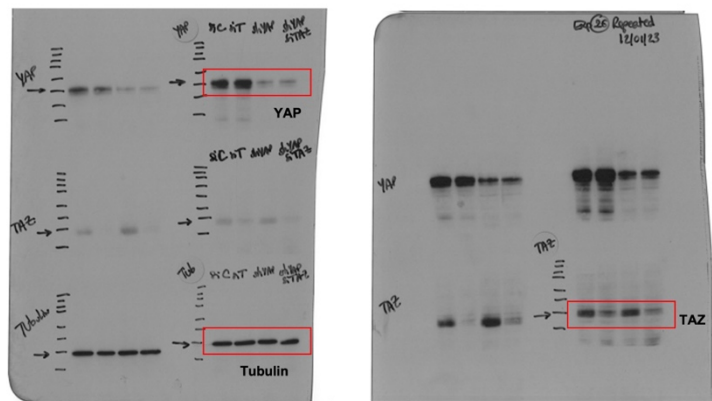

Supplemental Figure S4. Uncropped western-blot - part 1

Figure 3E

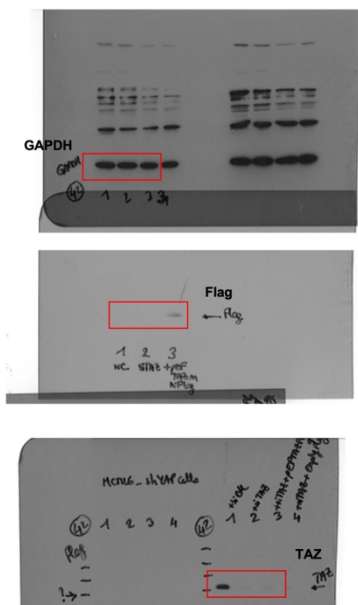

Figure 6A

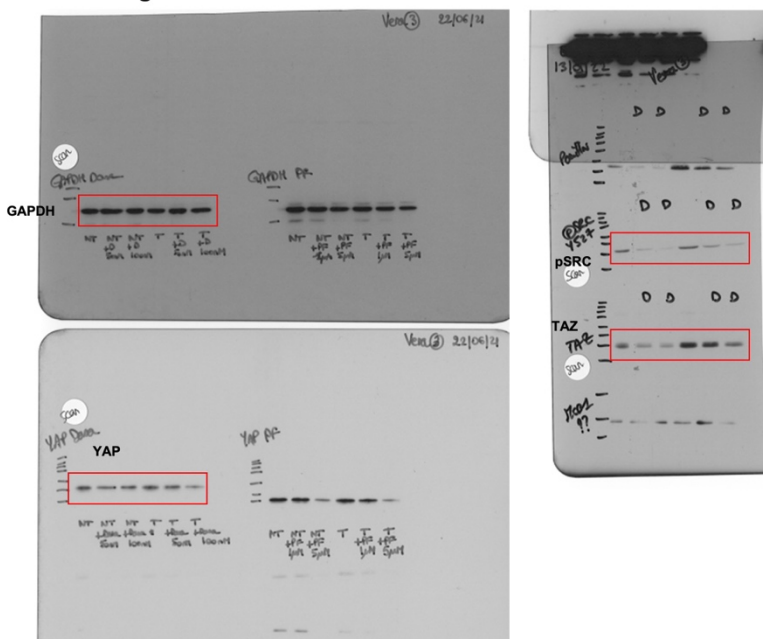

Figure S3A

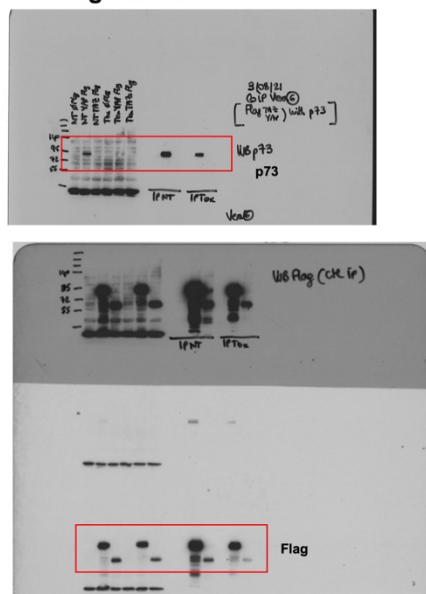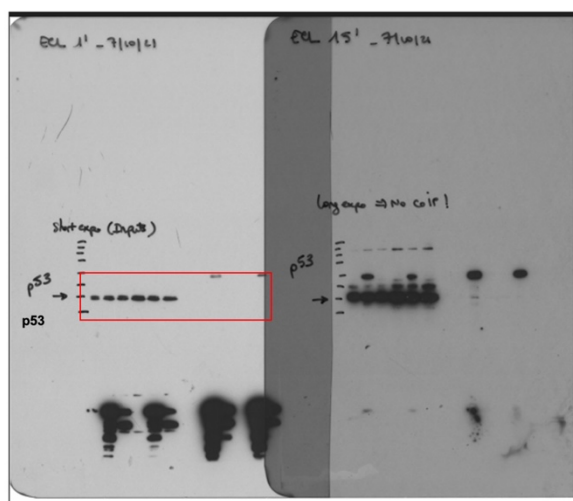

Supplemental Figure S5. Uncropped western-blots - part 2

### **Supplemental Table 1. Differentially expressed genes in HCT116 cells after oxaliplatin treatment for 24h at IC50**

Only differentially expressed genes with an adjusted p-value < 0.05 are shown. Columns are:

test\_id: position and description of the feature tested

ENSG\_ID: Ensemble gene ID

symbol: gene symbol

sample\_1: first group in the comparison; untreated cells

sample\_2: second group in the comparison; cells treated with oxaliplatin

mean\_1: mean of normalized count for the first group in the comparison

mean\_2: mean of normalized count for the second group in the comparison

log2FoldChange: log2 fold change estimates

pvalue: pvalue

padj: pvalue adjusted for multiple testing with the Benjamini-Hochberg procedure, which controls false discovery rate (FDR)

### **Supplemental Table 2. g:profiler functional enrichment analyses**

Columns are :

GO\_ID: Gene Ontology

KEGG\_ID: KEGG pathways

REAC\_ID: Reactome pathways

WP\_ID: WikiPathways

TF\_ID: regulatory motif matches from TRANSFAC

MIRNA\_ID: miRNA targets from miRTarBase

CORUM\_ID: protein complexes from CORUM

HPA\_ID: tissue specificity from Human Protein Atlas

HP\_ID: human disease phenotypes from Human Phenotype Ontology

Description: description of the functional group

p.Val: p-value

FDR: false discovery rate

Genes: genes found in the intersection
